# Supplementary material for: The solution structure of homotrimetallic lanthanide helicates investigated with novel model-free multi-centre paramagnetic NMR methodsElectronic supplementary information (ESI) available: tables of structural factors Cikl, Dikl obtained for the model complexes and for [Ln3(L1)3]9+ in solution (Table S1) and geometrical factors calculated for the structure of [Eu3(L1)3]9+ optimized in the gas phase (Table S2). Figures showing a plot of 1/Tpara1i vs. according to eqn. (19) (Fig. S1), a plot of AFikl for the 165 Hikl triplets in [Ln3(L1)3]9+ (Fig. S2) and comparisons of structural parameters between the optimized gas phase model and the solution structure (Figs. S3 and S4). See http://www.rsc.org/suppdata/dt/b2/b212352e/
Source: Royal Society of Chemistry journal article supplement (doi:10.1039/b212352e), 2003-03-04
Supplement: b212352e.pdf [file b212352e.pdf]

**The solution structure of homotrimetallic lanthanide helicates investigated with novel model-free multi-centre paramagnetic NMR methods.**

---

Nadjet Ouali, Jean-Pierre Rivera, Pierre-Yves Morgantini, Jacques Weber and Claude Piguet\*

**Supporting information**

**Table S1.** Selected Structural Parameters  $C_{ikl} = R_{ik} \cdot \left( \frac{G_i^1 - G_l^1 R_{il}}{G_k^1 R_{ik} - G_l^1 R_{il}} \right)$  and  $D_{ikl} = -R_{il} \cdot \left( \frac{G_i^1 - G_k^1 R_{ik}}{G_k^1 R_{ik} - G_l^1 R_{il}} \right)$  and Intercepts  $B_{ikl} = F_i - F_k C_{ikl} - F_l D_{ikl}$

Obtained from Least-square Planes for  $\left( \frac{d_{ij}^{\text{para}}}{\langle S_z \rangle_j}, \frac{d_{kj}^{\text{para}}}{\langle S_z \rangle_j}, \frac{d_{lj}^{\text{para}}}{\langle S_z \rangle_j} \right)$  According to Eqn (12) for the Aromatic Protons H1-H11 in  $[\text{Ln}_3(\text{L1})_3]^{9+}$

(Ln = Ce-Yb,  $\text{CD}_3\text{CN}$ , 298 K).<sup>a</sup>

| $H_{i,k,l}$ | $B_{ikl}^{\text{solution}}$ | $C_{ikl}^{\text{solution}}$ | $D_{ikl}^{\text{solution}}$ | $AF_i^{\text{b}}$ | $AF_k^{\text{b}}$ | $AF_l^{\text{b}}$ | $AF_{ikl}^{\text{b}}$ | $C_{ikl}^{\text{solid c}}$ | $D_{ikl}^{\text{solid c}}$ | $C_{ikl}^{\text{gas-phase d}}$ | $D_{ikl}^{\text{gas-phase d}}$ |
|-------------|-----------------------------|-----------------------------|-----------------------------|-------------------|-------------------|-------------------|-----------------------|----------------------------|----------------------------|--------------------------------|--------------------------------|
| H1,2,3      | -1.20                       | -5.54                       | 6.69                        | 0.054             | 0.095             | 0.005             | 0.036                 | -287.42                    | 384.28                     | -19.47                         | 25.24                          |
| H1,2,4      | 0.22                        | 0.85                        | 1.12                        | 0.088             | 0.071             | 0.051             | 0.041                 | 0.00                       | 1.54                       | -0.16                          | 0.76                           |
| H1,2,5      | 0.72                        | 2.03                        | -0.19                       | 0.194             | 0.002             | 0.047             | 0.066                 | -1.26                      | -0.38                      | -0.86                          | -0.14                          |
| H1,2,6      | 1.27                        | 3.22                        | -0.17                       | 0.218             | 0.001             | 0.033             | 0.073                 | -0.52                      | -0.30                      | -0.51                          | -0.14                          |
| H1,2,7      | 0.52                        | 1.18                        | 1.45                        | 0.066             | 0.058             | 0.027             | 0.031                 | 0.04                       | 1.62                       | -0.21                          | 0.39                           |
| H1,2,8      | -0.99                       | 1.05                        | -4.45                       | 0.023             | 0.147             | 0.011             | 0.050                 | -2.47                      | -13.49                     | -1.32                          | -8.05                          |
| H1,2,9      | 1.27                        | 3.12                        | -2.16                       | 0.153             | 0.114             | 0.024             | 0.064                 | -0.43                      | -4.24                      | 1.69                           | -4.08                          |
| H1,2,10     | 1.61                        | 5.27                        | -6.32                       | 0.101             | 0.345             | 0.009             | 0.120                 | 0.63                       | -4.53                      | 0.20                           | -2.83                          |
| H1,2,11     | 0.37                        | 1.01                        | -3.75                       | 0.021             | 0.153             | 0.010             | 0.052                 | -0.55                      | -3.53                      | -0.26                          | -2.39                          |
| H1,3,4      | 0.03                        | 0.89                        | 0.97                        | 0.157             | 0.071             | 0.059             | 0.061                 | 0.00                       | 1.54                       | -0.21                          | 0.77                           |
| H1,3,5      | 0.21                        | 1.85                        | -0.13                       | 0.245             | 0.001             | 0.044             | 0.083                 | -1.70                      | -0.38                      | -1.16                          | -0.15                          |
| H1,3,6      | 0.37                        | 2.49                        | -0.11                       | 0.266             | 0.001             | 0.036             | 0.089                 | -0.69                      | -0.30                      | -0.69                          | -0.15                          |
| H1,3,7      | 0.22                        | 1.18                        | 1.19                        | 0.117             | 0.058             | 0.033             | 0.045                 | 0.06                       | 1.62                       | -0.28                          | 0.40                           |
| H1,3,8      | -1.00                       | 1.14                        | -3.67                       | 0.040             | 0.135             | 0.012             | 0.047                 | -3.33                      | -13.61                     | -1.84                          | -8.64                          |
| H1,3,9      | 0.39                        | 2.49                        | -1.33                       | 0.219             | 0.086             | 0.030             | 0.079                 | -0.57                      | -4.24                      | 2.02                           | -3.75                          |

|         |        |        |         |       |       |       |       |       |        |       |       |
|---------|--------|--------|---------|-------|-------|-------|-------|-------|--------|-------|-------|
| H1,3,10 | 0.26   | 3.30   | -3.14   | 0.149 | 0.275 | 0.015 | 0.104 | 0.84  | -4.52  | 0.26  | -2.80 |
| H1,3,11 | 0.12   | 0.98   | -3.22   | 0.037 | 0.161 | 0.013 | 0.055 | -0.74 | -3.53  | -0.34 | -2.42 |
| H1,4,5  | -0.14  | 2.12   | 0.17    | 0.091 | 0.001 | 0.034 | 0.032 | 1.53  | 0.00   | 0.94  | 0.03  |
| H1,4,6  | -0.16  | 1.59   | 0.07    | 0.091 | 0.001 | 0.046 | 0.034 | 1.53  | 0.00   | 1.11  | 0.07  |
| H1,4,7  | -0.89  | 6.36   | -6.77   | 0.055 | 0.069 | 0.007 | 0.029 | 1.58  | -0.05  | 3.23  | -1.28 |
| H1,4,8  | 473.17 | 407.99 | 1621.69 | 0.015 | 0.155 | 0.000 | 0.052 | 1.54  | -0.01  | 0.87  | 1.12  |
| H1,4,9  | -0.18  | 1.63   | 1.00    | 0.063 | 0.069 | 0.031 | 0.033 | 1.53  | -0.01  | 0.69  | -0.36 |
| H1,4,10 | -0.04  | 1.36   | 1.31    | 0.061 | 0.278 | 0.036 | 0.096 | 1.54  | 0.01   | 0.42  | -1.26 |
| H1,4,11 | -1.58  | 20.87  | 65.91   | 0.014 | 0.142 | 0.001 | 0.048 | 1.53  | -0.01  | 2.08  | 4.14  |
| H1,5,6  | -0.25  | -0.53  | 0.31    | 0.010 | 0.005 | 0.092 | 0.031 | 0.26  | -0.50  | 0.22  | -0.36 |
| H1,5,7  | 0.31   | 0.36   | 4.14    | 0.001 | 0.086 | 0.014 | 0.029 | -0.01 | 1.57   | 0.05  | 0.52  |
| H1,5,8  | -4.27  | 0.42   | -13.97  | 0.000 | 0.136 | 0.003 | 0.045 | -0.78 | 14.11  | -0.41 | 14.80 |
| H1,5,9  | -0.28  | -0.49  | 3.38    | 0.002 | 0.154 | 0.021 | 0.052 | 0.19  | -6.39  | -0.10 | -1.37 |
| H1,5,10 | 0.12   | -0.29  | 3.30    | 0.001 | 0.373 | 0.019 | 0.125 | -0.13 | -3.02  | -0.03 | -2.29 |
| H1,5,11 | 0.08   | 0.47   | -12.53  | 0.000 | 0.100 | 0.002 | 0.033 | 0.30  | -6.27  | 0.06  | -3.40 |
| H1,6,7  | 0.08   | 0.13   | 2.47    | 0.001 | 0.090 | 0.025 | 0.031 | -0.02 | 1.50   | 0.10  | 0.67  |
| H1,6,8  | -2.45  | 0.13   | -7.66   | 0.000 | 0.144 | 0.006 | 0.048 | -0.38 | 3.57   | -0.23 | 5.13  |
| H1,6,9  | -0.97  | -5.07  | 60.62   | 0.002 | 0.212 | 0.002 | 0.071 | 1.40  | -24.19 | -0.11 | -0.95 |
| H1,6,10 | 0.57   | -0.38  | 7.29    | 0.001 | 0.425 | 0.010 | 0.142 | -0.16 | -2.04  | -0.04 | -2.03 |
| H1,6,11 | -0.07  | 0.15   | -6.75   | 0.000 | 0.112 | 0.004 | 0.037 | -4.58 | 50.72  | 0.14  | -4.73 |
| H1,7,8  | 13.12  | 14.53  | 39.39   | 0.018 | 0.104 | 0.001 | 0.035 | 1.60  | -0.23  | 0.47  | 1.54  |
| H1,7,9  | 0.06   | 2.48   | 1.59    | 0.032 | 0.031 | 0.009 | 0.015 | 1.48  | -0.39  | 0.35  | -0.45 |

|          |       |       |        |       |       |       |       |        |        |        |       |
|----------|-------|-------|--------|-------|-------|-------|-------|--------|--------|--------|-------|
| H1,7,10  | 0.21  | 1.87  | 1.85   | 0.030 | 0.117 | 0.011 | 0.040 | 1.74   | 0.33   | 0.19   | -1.45 |
| H1,7,11  | 4.01  | 66.55 | 166.02 | 0.011 | 0.072 | 0.000 | 0.024 | 1.51   | -0.25  | 2.31   | 11.58 |
| H1,8,9   | -2.58 | -7.96 | 1.82   | 0.111 | 0.018 | 0.004 | 0.038 | 2.81   | -5.12  | -4.52  | -1.79 |
| H1,8,10  | -1.70 | -5.82 | 2.11   | 0.104 | 0.070 | 0.006 | 0.042 | -2.75  | -3.61  | -1.06  | -2.46 |
| H1,8,11  | 6.16  | 19.82 | -20.69 | 0.069 | 0.091 | 0.001 | 0.038 | 3.89   | -4.54  | 1.93   | -2.96 |
| H1,9,10  | 0.68  | -4.89 | 7.60   | 0.038 | 0.156 | 0.004 | 0.053 | -2.53  | -1.82  | 0.55   | -3.21 |
| H1,9,11  | -0.09 | 1.59  | -6.36  | 0.013 | 0.091 | 0.004 | 0.031 | -18.52 | 11.90  | -0.53  | -2.07 |
| H1,10,11 | 0.10  | 1.82  | -4.78  | 0.054 | 0.095 | 0.005 | 0.036 | -2.11  | -1.88  | -1.58  | -1.05 |
| H2,3,4   | -0.21 | 1.11  | -0.20  | 0.071 | 0.005 | 0.044 | 0.028 | 1.34   | -0.01  | 1.31   | -0.04 |
| H2,3,5   | -0.24 | 0.96  | 0.03   | 0.090 | 0.000 | 0.065 | 0.037 | 1.34   | 0.00   | 1.36   | 0.01  |
| H2,3,6   | -0.27 | 0.86  | 0.02   | 0.094 | 0.000 | 0.075 | 0.040 | 1.34   | 0.00   | 1.33   | 0.01  |
| H2,3,7   | -0.25 | 1.01  | -0.22  | 0.081 | 0.009 | 0.055 | 0.033 | 1.34   | -0.01  | 1.31   | -0.02 |
| H2,3,8   | -0.04 | 1.00  | 0.65   | 0.088 | 0.060 | 0.060 | 0.041 | 1.35   | 0.05   | 1.39   | 0.44  |
| H2,3,9   | -0.27 | 0.83  | 0.26   | 0.088 | 0.020 | 0.073 | 0.039 | 1.34   | 0.01   | 1.19   | 0.19  |
| H2,3,10  | -0.25 | 0.67  | 0.51   | 0.086 | 0.129 | 0.088 | 0.060 | 1.33   | 0.02   | 1.28   | 0.14  |
| H2,3,11  | -0.24 | 1.03  | 0.59   | 0.076 | 0.057 | 0.051 | 0.036 | 1.34   | 0.01   | 1.31   | 0.12  |
| H2,4,5   | -0.42 | 1.16  | 0.20   | 0.093 | 0.003 | 0.133 | 0.054 | -1.22  | -0.30  | -1.09  | -0.21 |
| H2,4,6   | -0.44 | 0.49  | 0.08   | 0.063 | 0.001 | 0.212 | 0.074 | -2.97  | -0.58  | -2.15  | -0.41 |
| H2,4,7   | -0.75 | 2.45  | -3.14  | 0.039 | 0.059 | 0.026 | 0.025 | 36.86  | -38.96 | -15.27 | 7.93  |
| H2,4,8   | 3.16  | 3.10  | 12.16  | 0.015 | 0.149 | 0.008 | 0.050 | -0.62  | -5.46  | -0.66  | -6.94 |
| H2,4,9   | -0.47 | 0.55  | 1.06   | 0.036 | 0.123 | 0.108 | 0.056 | -3.59  | -9.91  | 0.41   | 2.20  |
| H2,4,10  | -0.31 | 0.26  | 1.43   | 0.014 | 0.355 | 0.087 | 0.122 | 2.44   | 7.19   | 2.09   | 7.79  |

|          |        |        |         |       |       |       |       |       |        |       |        |
|----------|--------|--------|---------|-------|-------|-------|-------|-------|--------|-------|--------|
| H2,4,11  | -0.63  | 3.37   | 11.09   | 0.013 | 0.132 | 0.006 | 0.044 | -2.77 | -6.37  | -8.14 | -25.55 |
| H2,5,6   | -0.47  | -0.15  | 0.14    | 0.004 | 0.003 | 0.244 | 0.081 | -0.51 | 0.40   | -0.42 | 0.42   |
| H2,5,7   | 0.02   | 0.59   | 4.40    | 0.002 | 0.124 | 0.040 | 0.044 | -0.29 | -1.24  | -0.22 | -0.61  |
| H2,5,8   | -4.17  | 0.55   | -12.59  | 0.000 | 0.146 | 0.008 | 0.049 | 0.31  | -11.18 | 0.31  | -17.29 |
| H2,5,9   | -0.50  | -0.17  | 1.86    | 0.001 | 0.148 | 0.074 | 0.055 | -0.45 | 5.06   | -0.06 | 1.60   |
| H2,5,10  | -0.28  | -0.06  | 1.81    | 0.000 | 0.350 | 0.068 | 0.119 | -0.20 | 2.39   | -0.14 | 2.68   |
| H2,5,11  | -0.26  | 0.55   | -10.55  | 0.000 | 0.123 | 0.006 | 0.041 | -0.53 | 4.97   | -0.24 | 3.97   |
| H2,6,7   | -0.36  | 0.10   | 0.85    | 0.002 | 0.115 | 0.191 | 0.074 | -0.53 | -2.90  | -0.47 | -1.30  |
| H2,6,8   | -1.64  | 0.15   | -3.93   | 0.000 | 0.190 | 0.032 | 0.064 | 0.15  | -6.91  | 0.18  | -9.97  |
| H2,6,9   | -0.49  | -0.44  | 5.49    | 0.001 | 0.201 | 0.034 | 0.068 | -3.29 | 46.84  | -0.06 | 1.85   |
| H2,6,10  | -0.21  | -0.07  | 2.38    | 0.000 | 0.361 | 0.053 | 0.122 | -0.26 | 3.95   | -0.20 | 3.95   |
| H2,6,11  | -0.42  | 0.16   | -3.36   | 0.000 | 0.203 | 0.031 | 0.068 | 8.29  | -98.19 | -0.55 | 9.20   |
| H2,7,8   | -19.13 | -18.70 | -56.57  | 0.016 | 0.106 | 0.001 | 0.036 | -0.65 | -5.37  | -0.36 | -7.25  |
| H2,7,9   | -0.39  | 0.99   | 1.48    | 0.054 | 0.122 | 0.077 | 0.052 | -3.46 | -9.03  | 0.21  | 2.14   |
| H2,7,10  | -0.25  | 0.39   | 1.66    | 0.020 | 0.341 | 0.072 | 0.116 | 2.76  | 7.70   | 0.96  | 6.85   |
| H2,7,11  | -1.32  | -15.33 | -39.21  | 0.010 | 0.071 | 0.001 | 0.024 | -2.73 | -5.93  | -9.06 | -54.72 |
| H2,8,9   | -1.45  | -3.23  | 1.56    | 0.132 | 0.045 | 0.027 | 0.047 | -6.60 | 2.07   | -2.67 | 1.35   |
| H2,8,10  | -0.67  | -1.31  | 1.69    | 0.100 | 0.240 | 0.050 | 0.088 | -4.35 | 1.46   | -5.28 | 1.86   |
| H2,8,11  | 52.78  | 170.39 | -145.34 | 0.079 | 0.084 | 0.000 | 0.038 | -7.04 | 1.84   | -7.55 | 2.24   |
| H2,9,10  | -0.12  | -1.17  | 3.05    | 0.035 | 0.239 | 0.028 | 0.081 | -4.01 | 4.28   | 2.73  | -1.90  |
| H2,9,11  | -0.44  | 1.54   | -2.69   | 0.051 | 0.159 | 0.031 | 0.056 | 33.52 | -27.92 | 2.09  | -1.22  |
| H2,10,11 | -0.27  | 1.66   | -1.07   | 0.266 | 0.116 | 0.057 | 0.099 | 3.83  | -2.98  | 6.20  | -5.22  |

|         |       |        |        |       |       |       |       |       |        |        |        |
|---------|-------|--------|--------|-------|-------|-------|-------|-------|--------|--------|--------|
| H3,4,5  | -0.19 | 1.17   | 0.17   | 0.064 | 0.002 | 0.132 | 0.049 | -0.91 | -0.22  | -0.81  | -0.16  |
| H3,4,6  | -0.21 | 0.66   | 0.07   | 0.056 | 0.001 | 0.207 | 0.072 | -2.22 | -0.43  | -1.62  | -0.31  |
| H3,4,7  | -0.43 | 2.03   | -2.37  | 0.034 | 0.047 | 0.040 | 0.024 | 27.57 | -29.14 | -11.65 | 6.07   |
| H3,4,8  | 1.74  | 1.85   | 6.50   | 0.015 | 0.136 | 0.020 | 0.046 | -0.46 | -4.08  | -0.47  | -5.31  |
| H3,4,9  | -0.23 | 0.66   | 0.92   | 0.033 | 0.081 | 0.119 | 0.049 | -2.68 | -7.41  | 0.34   | 1.68   |
| H3,4,10 | -0.09 | 0.40   | 1.22   | 0.018 | 0.254 | 0.107 | 0.092 | 1.83  | 5.38   | 1.63   | 5.96   |
| H3,4,11 | -0.32 | 2.47   | 7.51   | 0.013 | 0.121 | 0.012 | 0.041 | -2.07 | -4.77  | -6.20  | -19.55 |
| H3,5,6  | -0.24 | -0.21  | 0.16   | 0.005 | 0.003 | 0.311 | 0.104 | -0.38 | 0.30   | -0.32  | 0.31   |
| H3,5,7  | 0.15  | 0.41   | 3.32   | 0.002 | 0.112 | 0.069 | 0.044 | -0.22 | -0.93  | -0.17  | -0.45  |
| H3,5,8  | -4.52 | 0.61   | -14.54 | 0.000 | 0.147 | 0.010 | 0.049 | 0.23  | -8.32  | 0.22   | -12.75 |
| H3,5,9  | -0.27 | -0.20  | 1.92   | 0.001 | 0.145 | 0.102 | 0.059 | -0.34 | 3.77   | -0.05  | 1.18   |
| H3,5,10 | -0.05 | -0.09  | 1.81   | 0.001 | 0.301 | 0.086 | 0.104 | -0.15 | 1.78   | -0.11  | 1.97   |
| H3,5,11 | -0.04 | 0.45   | -9.16  | 0.000 | 0.115 | 0.010 | 0.038 | -0.40 | 3.70   | -0.18  | 2.93   |
| H3,6,7  | -0.11 | 0.10   | 1.06   | 0.001 | 0.110 | 0.210 | 0.079 | -0.40 | -2.17  | -0.36  | -0.98  |
| H3,6,8  | -1.48 | 0.14   | -4.18  | 0.000 | 0.180 | 0.041 | 0.062 | 0.11  | -5.16  | 0.13   | -7.49  |
| H3,6,9  | -0.31 | -0.81  | 9.73   | 0.001 | 0.208 | 0.029 | 0.070 | -2.46 | 34.97  | -0.05  | 1.39   |
| H3,6,10 | 0.06  | -0.10  | 2.67   | 0.000 | 0.344 | 0.066 | 0.117 | -0.19 | 2.95   | -0.16  | 2.97   |
| H3,6,11 | -0.18 | 0.13   | -3.37  | 0.000 | 0.165 | 0.037 | 0.057 | 6.19  | -73.31 | -0.42  | 6.91   |
| H3,7,8  | 14.69 | 15.08  | 44.72  | 0.017 | 0.106 | 0.002 | 0.036 | -0.48 | -4.02  | -0.26  | -5.53  |
| H3,7,9  | -0.13 | 1.14   | 1.37   | 0.054 | 0.097 | 0.096 | 0.049 | -2.59 | -6.76  | 0.17   | 1.63   |
| H3,7,10 | -0.01 | 0.59   | 1.54   | 0.025 | 0.258 | 0.086 | 0.091 | 2.07  | 5.76   | 0.74   | 5.23   |
| H3,7,11 | -1.57 | -23.37 | -60.28 | 0.010 | 0.072 | 0.001 | 0.024 | -2.04 | -4.43  | -6.89  | -41.75 |

|          |       |       |        |       |       |       |       |       |        |       |       |
|----------|-------|-------|--------|-------|-------|-------|-------|-------|--------|-------|-------|
| H3,8,9   | -1.38 | -3.78 | 1.52   | 0.133 | 0.038 | 0.034 | 0.047 | -4.93 | 1.54   | -2.24 | 0.97  |
| H3,8,10  | -0.61 | -1.85 | 1.59   | 0.104 | 0.166 | 0.054 | 0.068 | -3.26 | 1.08   | -4.12 | 1.34  |
| H3,8,11  | 6.73  | 22.03 | -19.44 | 0.076 | 0.084 | 0.003 | 0.038 | -5.25 | 1.36   | -5.75 | 1.61  |
| H3,9,10  | 0.13  | -1.49 | 3.13   | 0.029 | 0.162 | 0.027 | 0.056 | -3.00 | 3.20   | 2.13  | -1.59 |
| H3,9,11  | -0.19 | 1.36  | -2.92  | 0.036 | 0.137 | 0.036 | 0.049 | 25.02 | -20.86 | 1.59  | -1.03 |
| H3,10,11 | -0.04 | 1.48  | -1.51  | 0.162 | 0.111 | 0.056 | 0.068 | 2.86  | -2.23  | 4.72  | -4.07 |
| H4,5,6   | -0.06 | -0.34 | 0.16   | 0.005 | 0.002 | 0.080 | 0.027 | 0.17  | -0.33  | 0.20  | -0.38 |
| H4,5,7   | 0.22  | 0.10  | 2.02   | 0.001 | 0.077 | 0.032 | 0.028 | -0.01 | 1.02   | 0.01  | 0.56  |
| H4,5,8   | -2.78 | 0.24  | -9.35  | 0.000 | 0.143 | 0.006 | 0.048 | -0.51 | 9.20   | -0.47 | 15.80 |
| H4,5,9   | -0.08 | -0.33 | 1.84   | 0.003 | 0.170 | 0.052 | 0.059 | 0.13  | -4.17  | -0.14 | -1.46 |
| H4,5,10  | 0.13  | -0.22 | 1.62   | 0.002 | 0.337 | 0.044 | 0.113 | -0.08 | -1.97  | -0.07 | -2.45 |
| H4,5,11  | 0.12  | 0.22  | -7.39  | 0.000 | 0.109 | 0.005 | 0.037 | 0.19  | -4.09  | 0.03  | -3.63 |
| H4,6,7   | 0.15  | 0.03  | 1.56   | 0.000 | 0.073 | 0.040 | 0.028 | -0.01 | 0.98   | 0.03  | 0.60  |
| H4,6,8   | -1.51 | 0.05  | -5.05  | 0.000 | 0.148 | 0.012 | 0.050 | -0.25 | 2.33   | -0.27 | 4.63  |
| H4,6,9   | 0.51  | 2.13  | -28.07 | 0.001 | 0.212 | 0.004 | 0.071 | 0.92  | -15.79 | -0.16 | -0.86 |
| H4,6,10  | 0.49  | -0.30 | 4.90   | 0.001 | 0.436 | 0.019 | 0.146 | -0.11 | -1.33  | -0.10 | -1.83 |
| H4,6,11  | 0.05  | 0.06  | -4.41  | 0.000 | 0.118 | 0.008 | 0.040 | -2.99 | 33.09  | 0.07  | -4.27 |
| H4,7,8   | 2.17  | 3.30  | 6.09   | 0.023 | 0.089 | 0.006 | 0.031 | 1.04  | -0.15  | 0.54  | 0.48  |
| H4,7,9   | 0.15  | 1.65  | 0.56   | 0.062 | 0.032 | 0.032 | 0.025 | 0.96  | -0.25  | 0.51  | -0.14 |
| H4,7,10  | 0.21  | 1.45  | 0.76   | 0.046 | 0.097 | 0.027 | 0.037 | 1.13  | 0.21   | 0.46  | -0.45 |
| H4,7,11  | 1.25  | 19.46 | 46.36  | 0.011 | 0.071 | 0.000 | 0.024 | 0.98  | -0.16  | 1.11  | 3.58  |
| H4,8,9   | -1.70 | -5.59 | 0.85   | 0.136 | 0.015 | 0.010 | 0.046 | 1.84  | -3.33  | -6.52 | -2.06 |

|          |         |         |         |       |       |       |       |        |        |        |        |
|----------|---------|---------|---------|-------|-------|-------|-------|--------|--------|--------|--------|
| H4,8,10  | -1.28   | -4.57   | 1.01    | 0.129 | 0.053 | 0.011 | 0.047 | -1.78  | -2.35  | -2.53  | -2.84  |
| H4,8,11  | 1.35    | 4.10    | -6.77   | 0.046 | 0.096 | 0.004 | 0.035 | 2.54   | -2.96  | 0.93   | -3.41  |
| H4,9,10  | 0.51    | -3.53   | 4.54    | 0.025 | 0.085 | 0.004 | 0.030 | -1.64  | -1.19  | 1.31   | -4.63  |
| H4,9,11  | 0.05    | 0.57    | -4.23   | 0.009 | 0.119 | 0.009 | 0.040 | -12.08 | 7.77   | -0.26  | -2.99  |
| H4,10,11 | 0.12    | 0.72    | -3.69   | 0.032 | 0.109 | 0.009 | 0.038 | -1.38  | -1.22  | -0.76  | -2.50  |
| H5,6,7   | -0.62   | 0.37    | -4.54   | 0.001 | 0.083 | 0.003 | 0.028 | 1.83   | 5.70   | 2.11   | 3.09   |
| H5,6,8   | 3.82    | 0.38    | 13.42   | 0.000 | 0.128 | 0.001 | 0.043 | 0.48   | 13.57  | 0.57   | 23.62  |
| H5,6,9   | -1.49   | -4.89   | 71.45   | 0.001 | 0.212 | 0.000 | 0.071 | 7.26   | -92.03 | 1.14   | -4.37  |
| H5,6,10  | -1.74   | 1.38    | -16.03  | 0.001 | 0.468 | 0.001 | 0.156 | 1.29   | -7.75  | 1.46   | -9.36  |
| H5,6,11  | -0.33   | 0.33    | 12.27   | 0.000 | 0.098 | 0.000 | 0.033 | -15.50 | 192.93 | 2.30   | -21.79 |
| H5,7,8   | -54.44  | -61.09  | -162.31 | 0.018 | 0.105 | 0.000 | 0.035 | -2.05  | 18.46  | -1.15  | 32.40  |
| H5,7,9   | -0.70   | -5.85   | 2.51    | 0.119 | 0.076 | 0.003 | 0.047 | 7.63   | 31.05  | -3.66  | -9.56  |
| H5,7,10  | -0.40   | -6.66   | 3.66    | 0.108 | 0.237 | 0.002 | 0.087 | -13.77 | -26.46 | -7.01  | -30.61 |
| H5,7,11  | 1.85    | 33.82   | 104.90  | 0.008 | 0.071 | 0.000 | 0.024 | 5.10   | 20.38  | 37.72  | 244.51 |
| H5,8,9   | 6.57    | 21.99   | 0.35    | 0.152 | 0.002 | 0.000 | 0.051 | 14.55  | 6.59   | 47.20  | 4.36   |
| H5,8,10  | 6.66    | 22.03   | 0.95    | 0.152 | 0.012 | 0.000 | 0.051 | 21.70  | 4.64   | 38.75  | 6.00   |
| H5,8,11  | -5.99   | -18.48  | 34.51   | 0.042 | 0.099 | 0.000 | 0.036 | 13.16  | 5.85   | 31.45  | 7.22   |
| H5,9,10  | -2.14   | 17.66   | -17.96  | 0.043 | 0.117 | 0.000 | 0.042 | 19.98  | -9.43  | -20.03 | 33.53  |
| H5,9,11  | -0.31   | 1.73    | 16.14   | 0.008 | 0.130 | 0.000 | 0.044 | -62.69 | 61.52  | -8.71  | 21.64  |
| H5,10,11 | -0.10   | 2.12    | 17.80   | 0.023 | 0.129 | 0.000 | 0.044 | -7.15  | 14.87  | -25.81 | 38.30  |
| H6,7,8   | -185.55 | -193.01 | -559.53 | 0.017 | 0.106 | 0.000 | 0.036 | -4.24  | 10.09  | -2.01  | 15.36  |
| H6,7,9   | -0.12   | 2.58    | 16.06   | 0.022 | 0.202 | 0.001 | 0.068 | 1.05   | 16.96  | -3.20  | -4.53  |



|          |         |         |          |       |       |       |       |        |        |        |        |
|----------|---------|---------|----------|-------|-------|-------|-------|--------|--------|--------|--------|
| H6,7,10  | 1.27    | -3.98   | 17.58    | 0.028 | 0.499 | 0.001 | 0.167 | -10.64 | -14.46 | -4.78  | -14.51 |
| H6,7,11  | 6.73    | 104.95  | 287.17   | 0.010 | 0.071 | 0.000 | 0.024 | -0.33  | 11.13  | 16.42  | 115.92 |
| H6,8,9   | 1628.72 | 5061.73 | -2383.09 | 0.193 | 0.064 | 0.000 | 0.068 | 2.00   | 13.59  | 41.23  | 7.63   |
| H6,8,10  | 6.91    | 19.90   | 7.78     | 0.207 | 0.150 | 0.001 | 0.085 | 16.77  | 9.58   | 26.47  | 10.49  |
| H6,8,11  | -34.63  | -112.04 | 115.14   | 0.069 | 0.089 | 0.000 | 0.038 | -0.85  | 12.07  | 13.69  | 12.63  |
| H6,9,10  | -1.99   | 19.97   | -20.21   | 0.081 | 0.217 | 0.000 | 0.077 | 15.44  | -1.30  | -13.68 | 29.29  |
| H6,9,11  | 0.38    | -10.59  | 40.39    | 0.040 | 0.272 | 0.000 | 0.092 | 4.04   | 8.48   | -3.79  | 18.90  |
| H6,10,11 | 0.82    | 8.75    | 15.94    | 0.172 | 0.211 | 0.001 | 0.091 | 0.46   | 11.49  | -11.24 | 26.15  |
| H7,8,9   | -1.04   | -3.13   | 0.06     | 0.107 | 0.001 | 0.016 | 0.036 | 1.91   | -3.21  | -12.89 | -3.80  |
| H7,8,10  | -1.02   | -3.09   | 0.11     | 0.106 | 0.007 | 0.016 | 0.036 | -1.58  | -2.26  | -5.53  | -5.22  |
| H7,8,11  | -0.14   | -0.27   | -2.32    | 0.006 | 0.070 | 0.011 | 0.024 | 2.58   | -2.85  | 0.83   | -6.29  |
| H7,9,10  | 0.25    | -2.59   | 3.02     | 0.043 | 0.133 | 0.011 | 0.047 | -1.45  | -1.24  | 2.86   | -9.15  |
| H7,9,11  | -0.06   | -0.01   | -2.54    | 0.000 | 0.072 | 0.011 | 0.024 | -12.29 | 8.07   | -0.23  | -5.91  |
| H7,10,11 | -0.06   | -0.01   | -2.55    | 0.000 | 0.073 | 0.011 | 0.024 | -1.40  | -1.08  | -0.68  | -5.47  |
| H8,9,10  | -0.41   | 0.86    | -1.00    | 0.040 | 0.123 | 0.066 | 0.048 | 0.92   | -0.65  | -0.52  | 0.71   |
| H8,9,11  | -0.31   | -0.01   | 0.87     | 0.001 | 0.085 | 0.078 | 0.038 | -4.76  | 4.23   | -0.28  | 0.46   |
| H8,10,11 | -0.31   | 0.03    | 0.84     | 0.004 | 0.083 | 0.079 | 0.038 | -0.54  | 0.69   | -0.82  | 0.99   |
| H9,10,11 | 0.12    | 1.14    | 1.00     | 0.104 | 0.062 | 0.035 | 0.042 | 0.11   | 0.74   | 2.96   | -1.91  |

<sup>a</sup> The errors on  $B_{ikl}^{\text{solution}}$ ,  $C_{ikl}^{\text{solution}}$  and  $D_{ikl}^{\text{solution}}$  are typically between 10-20%. <sup>b</sup>  $AF_{\alpha} = \sqrt{\frac{\sum_j \left( \delta_{\alpha j}^{\text{para obs}} / \langle S_z \rangle_j - \delta_{\alpha j}^{\text{para calc}} / \langle S_z \rangle_j \right)^2}{\sum_j \left( \delta_{\alpha j}^{\text{para obs}} / \langle S_z \rangle_j \right)^2}}$  ( $\alpha = i, k, l$ ) and

$AF_{ikl} = 1/3 \sqrt{AF_i^2 + AF_k^2 + AF_l^2}$  (see text) <sup>c</sup> Calculated from the crystal structure of  $[\text{Eu}_3(\text{L1})_3](\text{CF}_3\text{SO}_3)_9(\text{CH}_3\text{CN})_9(\text{H}_2\text{O})_2$ <sup>16</sup> after averging to  $D_3$

symmetry. <sup>d</sup> Calculated from the  $D_3$ -symmetrical optimized structure for  $[\text{Eu}_3(\text{L1})_3]^{9+}$  in the gas phase.

**Table S2** Geometrical Factors  $G_i^1$  and  $G_i^2 + G_i^3$  for the Aromatic Protons H1-H11 Calculated in the Structure of  $[\text{Eu}_3(\text{L1})_3]^{9+}$  Optimized in the Gas Phase ( $G_i^{m\text{gas-phase}}$ ) and in Solution ( $G_i^{m\text{solution}}$ ) with Eqns (22) and (23) for  $[\text{Ln}_3(\text{L1})_3]^{9+}$  ( $\text{CD}_3\text{CN}$ , 298 K)

| Proton | $G_i^{1\text{gas-phase}}$ | $G_i^{2\text{gas-phase}} + G_i^{3\text{gas-phase}}$ | $G_i^{1\text{solution}}$ | $G_i^{2\text{solution}} + G_i^{3\text{solution}}$ |
|--------|---------------------------|-----------------------------------------------------|--------------------------|---------------------------------------------------|
| H1     | -1.21E-03                 | 2.48E-03                                            | 7.77E-03                 | -8.75E-04                                         |
| H2     | 3.98E-03                  | -1.70E-03                                           | 2.38E-03                 | -1.06E-03                                         |
| H3     | 3.02E-03                  | -1.21E-03                                           | a                        | a                                                 |
| H4     | -7.41E-04                 | 2.90E-03                                            | 5.39E-03                 | -1.50E-03                                         |
| H5     | -1.53E-02                 | -7.11E-03                                           | -2.02E-02                | -8.23E-03                                         |
| H6     | -5.88E-03                 | -1.12E-02                                           | -1.09E-02                | -1.17E-02                                         |
| H7     | -9.24E-04                 | 5.36E-03                                            | 3.28E-03                 | 5.04E-04                                          |
| H8     | -5.04E-04                 | -2.94E-05                                           | -1.03E-03                | -7.60E-05                                         |
| H9     | 1.95E-03                  | -1.31E-03                                           | -5.37E-04                | -8.05E-04                                         |
| H10    | 7.10E-04                  | -9.96E-04                                           | a                        | a                                                 |
| H11    | 8.01E-05                  | -8.57E-04                                           | -1.30E-03                | 7.24E-05                                          |

<sup>a</sup> The  $G_i^1$  and  $G_i^2 + G_i^3$  for H3 and H10 in the structure of  $[\text{Eu}_3(\text{L1})_3]^{9+}$  optimized in the gas phase have been taken as references for calculating the related geometrical factors in solution for the remaining aromatic protons.

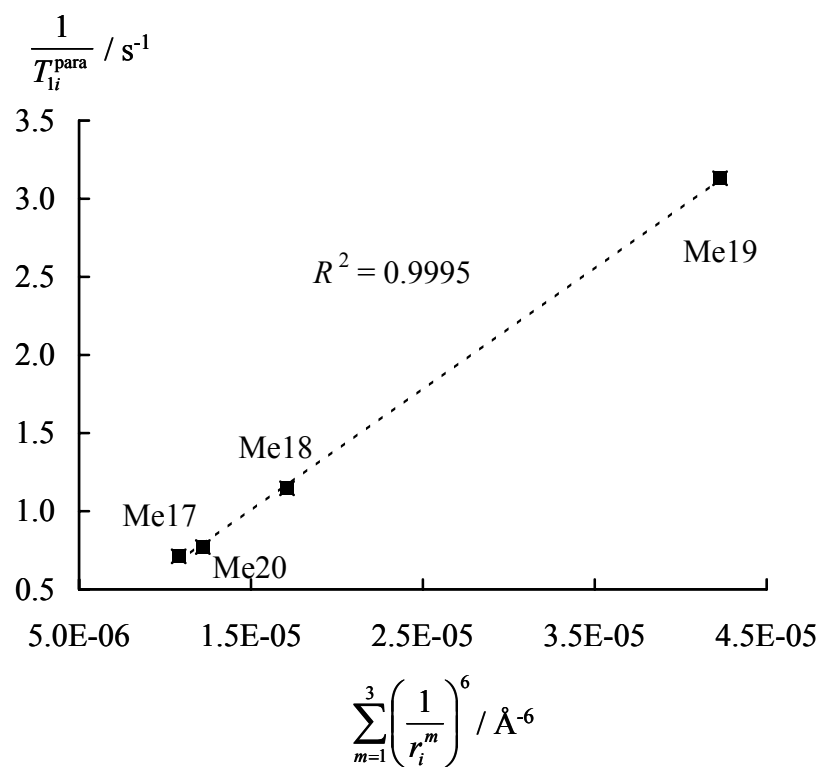

Figure S1 Plot of  $1/T_{li}^{para}$  vs  $\sum_{m=1}^3 \frac{1}{(r_i^m)^6}$  according to eqn (19) for the methyl groups Me17-Me20 in  $[\text{Ce}_3(\text{L}1)_3]^{9+}$ .

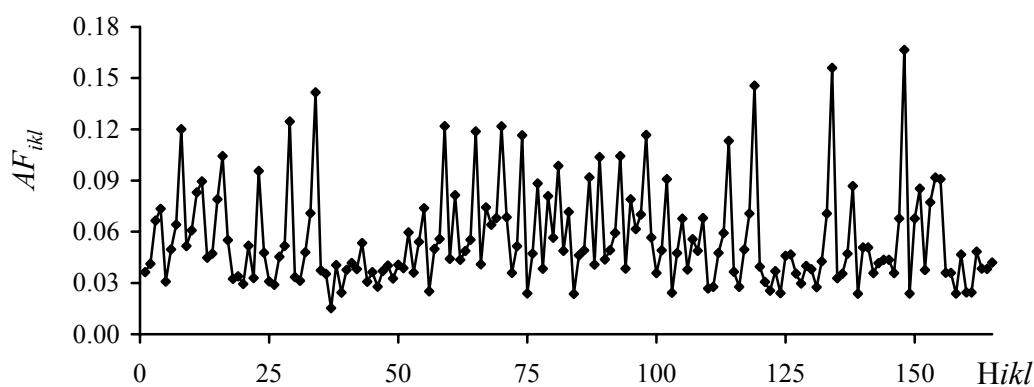

Figure S2

Figure S2 Plots of  $AF_{ikl} = 1/3\sqrt{AF_i^2 + AF_k^2 + AF_l^2}$  for the 165  $H_{ikl}$  triplets in  $[\text{Ln}_3(\text{L}1)_3]^{9+}$  (Ln = Ce-Yb).

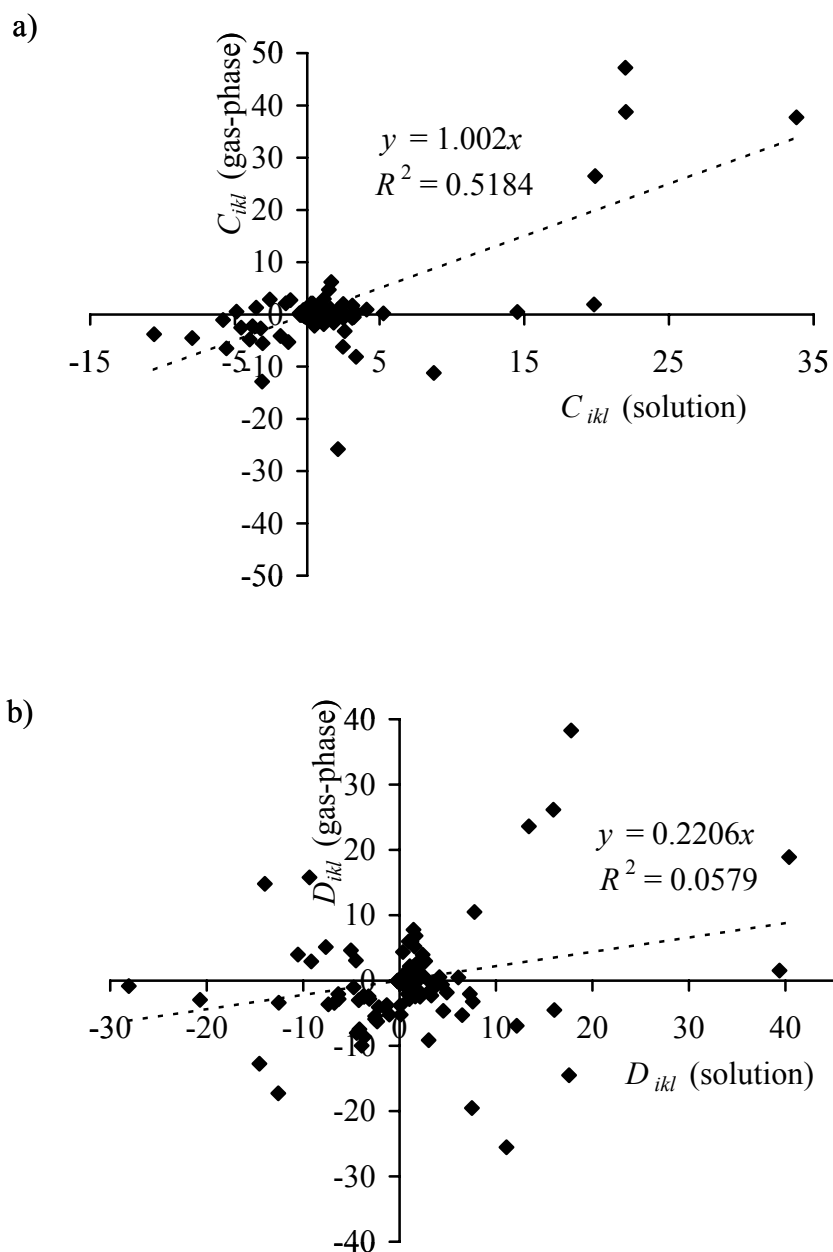

Figure S3 Plots of a)  $C_{ikl}^{\text{gas phase}}$  vs  $C_{ikl}^{\text{solution}}$ , and b)  $D_{ikl}^{\text{gas phase}}$  vs  $D_{ikl}^{\text{solution}}$  for the 125 contributing  $H_{ikl}$  triplets in  $[\text{Ln}_3(\text{L}1)_3]^{9+}$ .

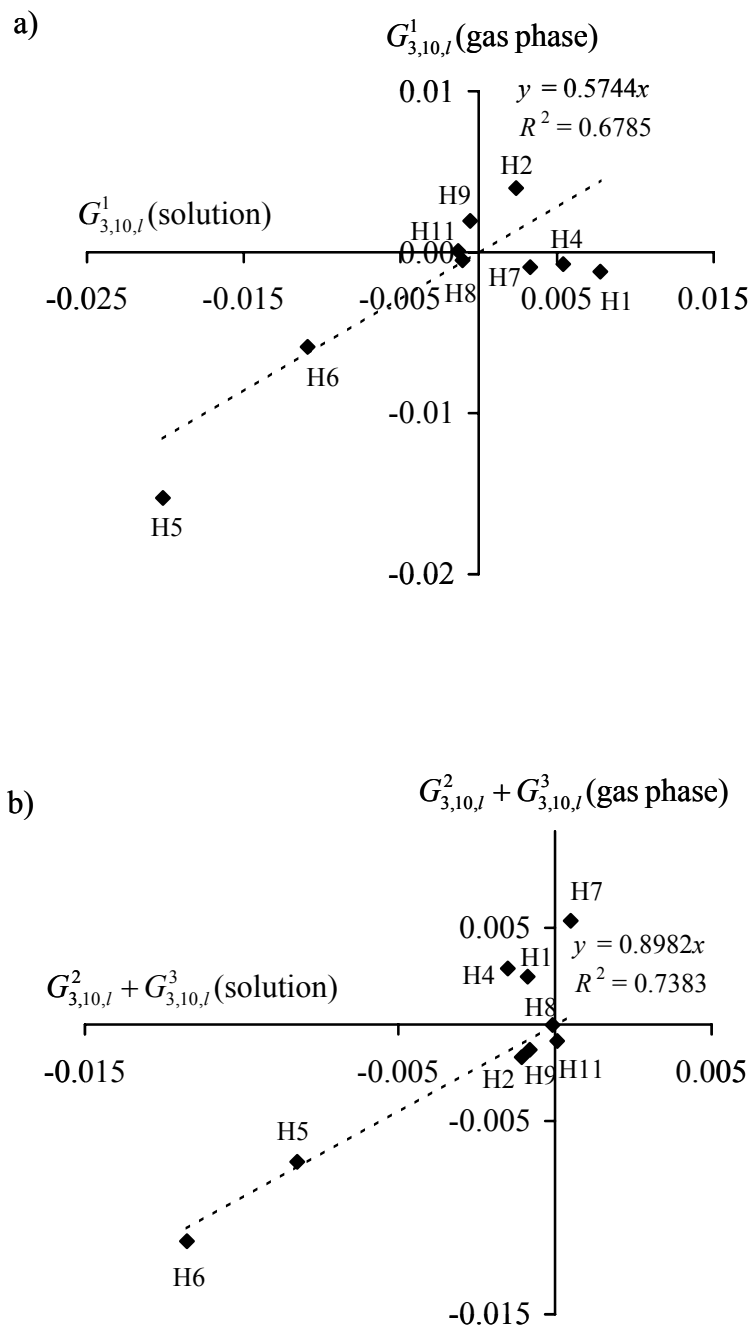

Figure S3

Figure S4 Plots of a)  $G_l^{1\text{gas phase}}$  vs  $G_l^{1\text{solution}}$ , and b)  $G_l^{2\text{gas phase}} + G_l^{3\text{gas phase}}$  vs  $G_l^{2\text{solution}} + G_l^{3\text{solution}}$  for H1, H2, H4, H5, H6, H7, H8, H9, H11 (H3 and H10 are taken as references, see text).
